# Supplementary material for: Causal associations between dried fruit intake and cardiovascular disease: A Mendelian randomization study
Source: Front Cardiovasc Med. 2023 Feb 6;10:1080252. doi: 10.3389/fcvm.2023.1080252 (PMC9939508; doi:10.3389/fcvm.2023.1080252)
Supplement: Supplementary file 1 [file Table_1.XLSX]

## Sheet: Sheet1
Table S1:Sources of the GWAS summary statistics for the confounders
Confounders	Sources
Fasting glucose	https://magicinvestigators.org/
Fasting insulin	https://magicinvestigators.org/
Type 2 diabetes	http://diagram-consortium.org/index.html
Body mass index	https://gwas.mrcieu.ac.uk/datasets/ukb-b-19953/
Systolic blood pressure	https://gwas.mrcieu.ac.uk/datasets/ieu-b-38/
Diastolic blood pressure	https://gwas.mrcieu.ac.uk/datasets/ieu-b-39/
Low density lipoprotein	http://csg.sph.umich.edu/willer/public/glgc-lipids2021/
High density lipoprotein	http://csg.sph.umich.edu/willer/public/glgc-lipids2021/
Total cholesterol	http://csg.sph.umich.edu/willer/public/glgc-lipids2021/
