# Supplementary material for: Causal associations between dried fruit intake and cardiovascular disease: A Mendelian randomization study
Source: Front Cardiovasc Med. 2023 Feb 6;10:1080252. doi: 10.3389/fcvm.2023.1080252 (PMC9939508; doi:10.3389/fcvm.2023.1080252)
Supplement: Supplementary file 2 [file Table_2.XLSX]

## Sheet: exposure
Table S2 Details of the 28 IVs.
Chr	Position	SNP	Effect Allele	Other Allele	EAF	Beta	SE	P-value
1	241054465	rs261809	G	A	0.540636	-0.00962858	0.00167902	9.80009e-09
1	72270797	rs12137234	T	C	0.303772	0.0102051	0.00183744	2.80001e-08
1	91191582	rs72720396	G	A	0.229157	0.0114265	0.00198541	8.70001e-09
1	204603861	rs11811826	A	T	0.224231	0.0132178	0.0020058	4.40048e-11
2	60231826	rs7582086	T	G	0.468273	-0.00962821	0.00167381	8.79995e-09
2	60718347	rs7599488	T	C	0.426408	-0.0104154	0.00168729	6.69993e-10
2	166183577	rs17184707	T	C	0.212811	-0.0114381	0.00204011	2.1e-08
3	18763543	rs4269101	G	T	0.718948	-0.0138099	0.00185921	1.10002e-13
3	43941406	rs11720884	G	A	0.250137	0.0111797	0.00193554	7.59994e-09
3	147239337	rs57499472	C	T	0.404131	0.00991231	0.00171869	8.10009e-09
4	2862190	rs10026792	A	G	0.290404	0.0108465	0.0018423	3.89996e-09
4	37175523	rs1648404	T	C	0.476112	0.00941595	0.00167357	1.79999e-08
6	31540429	rs746868	G	C	0.614662	-0.0129055	0.00171452	5.19996e-14
7	153485282	rs2533273	A	C	0.48453	-0.00987659	0.00167714	3.89996e-09
7	132716502	rs7808471	C	T	0.322136	-0.0115362	0.00178604	1.09999e-10
8	144258705	rs7829800	G	A	0.671041	-0.0104463	0.00178709	5.1e-09
10	126723567	rs893856	A	G	0.148988	-0.013361	0.00234923	1.29999e-08
11	95523433	rs1622515	G	A	0.484704	0.00991719	0.00167077	2.90001e-09
14	72170969	rs4140799	A	G	0.531856	0.0094566	0.00167846	1.79999e-08
14	22038125	rs34162196	T	C	0.101001	-0.0223628	0.00277168	7.10068e-16
14	77433198	rs10129747	G	A	0.530254	0.00935902	0.00168126	2.59998e-08
15	47821612	rs1797235	C	G	0.374623	-0.0100206	0.00174235	8.9e-09
15	45319982	rs11632215	C	A	0.120179	-0.0141434	0.00258382	4.39997e-08
16	73602926	rs862227	G	A	0.458327	-0.0091646	0.00167238	4.30002e-08
16	52105988	rs1582322	G	A	0.604805	0.00994346	0.00171571	6.80002e-09
17	56419228	rs62084586	C	T	0.165729	0.0133946	0.00226174	3.2e-09
17	1373612	rs8081370	T	C	0.910232	-0.0166666	0.00293795	1.40001e-08
18	60233646	rs11152349	A	G	0.302856	0.00991215	0.0018176	4.90004e-08
Chr, chromosome; SNP, single-nucleotide polymorphism; EAF, effect allele frequency; SE, standard error.
		F-statistics = 14.63
N: sample size; k: number of Ivs; MAF: minor allele frequency.
