# Supplementary material for: Causal associations between dried fruit intake and cardiovascular disease: A Mendelian randomization study
Source: Front Cardiovasc Med. 2023 Feb 6;10:1080252. doi: 10.3389/fcvm.2023.1080252 (PMC9939508; doi:10.3389/fcvm.2023.1080252)
Supplement: Supplementary file 3 [file Table_3.XLSX]

## Sheet: Sheet1
Table S3: Association of IVs with dried fruit exposure and with CVD outcomes.
IVs/SNPs	Exposure: Dried fruit intake		Outcome: CAD		Outcome: MI		Outcome: HF		Outcome: AIS		Outcome: LAS		Outcome: SVS		Outcome: CES
	beta.exposure	pval.exposure	beta.outcome	pval.outcome	beta.outcome	pval.outcome	beta.outcome	pval.outcome	beta.outcome	pval.outcome	beta.outcome	pval.outcome	beta.outcome	pval.outcome	beta.outcome	pval.outcome
rs10026792	0.0108465	3.89996e-09	-0.001944	0.859581	-0.0122139	0.316421	-0.0143	0.1008	-0.0049	0.6533	-0.0005	0.986	-0.0191	0.4492	0.0359	0.08502
rs10129747	0.00935902	2.59998e-08	-0.009601	0.312333	-0.0132987	0.207423	-0.0079	0.3249	0.0022	0.8268	-0.0283	0.251	0.0052	0.8228	0.0206	0.2822
rs11152349	0.00991215	4.90004e-08	-0.005475	0.574831	-0.00815041	0.449568	-0.0027	0.743	-0.0317	0.004183	-0.0277	0.3058	-0.0351	0.1657	-0.0427	0.04004
rs11632215	-0.0141434	4.39997e-08	0.005758	0.694605	0.0205322	0.211272	0.0002	0.985	-0.0192	0.2632	-0.0149	0.7293	-0.0059	0.8814	-0.0038	0.9074
rs11720884	0.0111797	7.59994e-09	-0.016416	0.127274	-0.0174933	0.146007	-0.0257	0.004025	-0.0256	0.02585	-0.039	0.1689	0.003	0.9004	-0.0101	0.6434
rs11811826	0.0132178	4.40048e-11	0.024188	0.0278949	0.0234585	0.0539516	0.0045	0.6331	0.0112	0.3554	0.0456	0.1219	-0.0052	0.8522	0.0235	0.3123
rs12137234	0.0102051	2.80001e-08	0.012705	0.271394	0.0143321	0.255664	0.0094	0.2872	0.0086	0.4481	-0.0343	0.218	-0.0105	0.6859	0.0252	0.2451
rs1582322	0.00994346	6.80002e-09	-0.014426	0.126721	-0.00527784	0.613868	-0.0173	0.03006	-0.0037	0.714	0.0248	0.3324	0.0326	0.1734	-0.0021	0.9121
rs1622515	0.00991719	2.90001e-09	0.00643	0.489044	0.0102579	0.31995	-0.013	0.09342	-0.0147	0.1377	-0.0134	0.5845	0.025	0.2729	-0.0132	0.4849
rs1648404	0.00941595	1.79999e-08	0.002356	0.796892	0.00940603	0.352971	0.0129	0.1013	0.0014	0.8925	0.0265	0.2769	0.0145	0.5215	0.0058	0.7588
rs17184707	-0.0114381	2.1e-08	0.016016	0.207455	0.0186109	0.174361	0.0227	0.01805	0.0344	0.005004	-0.0051	0.8687	0.0284	0.3169	0.0334	0.1614
rs1797235	-0.0100206	8.9e-09	-0.008214	0.386074	-0.00872983	0.407979	0.0011	0.8936	0.0059	0.5597	0.0398	0.1162	-0.0323	0.1694	0.0088	0.6507
rs2533273	-0.00987659	3.89996e-09	0.007176	0.529527	0.0152584	0.232228	-0.0091	0.2619	0.0061	0.5825	0.0238	0.3839	0.0217	0.3801	-0.0129	0.5484
rs261809	-0.00962858	9.80009e-09	0.002554	0.781657	0.00759959	0.455219	0.0053	0.4956	-0.0032	0.7561	-0.0214	0.4003	0.0138	0.5618	-0.0365	0.06312
rs34162196	-0.0223628	7.10068e-16	-0.021809	0.215429	-0.0158292	0.416972	0.0074	0.5794	0.009	0.5973	0.0234	0.5912	0.0189	0.6327	0.0319	0.3482
rs4140799	0.0094566	1.79999e-08	-0.023975	0.0151588	-0.0265676	0.0146865	-0.0024	0.7619	0.0082	0.4109	-0.0354	0.1509	-0.0248	0.2817	0.0047	0.8034
rs4269101	-0.0138099	1.10002e-13	0.005225	0.598829	0.00229597	0.83496	0.0005	0.9519	0.0197	0.07089	0.0322	0.2375	0.0505	0.04572	0.0029	0.8903
rs57499472	0.00991231	8.10009e-09	0.003157	0.736297	0.0104968	0.315319	0.0051	0.5241	-0.0245	0.01548	-0.0035	0.8881	0.0108	0.6422	-0.0248	0.1989
rs62084586	0.0133946	3.2e-09	-0.007584	0.549841	-0.00199209	0.88796	-0.0002	0.9859	-0.0135	0.3005	-0.0132	0.6863	-0.0352	0.2548	0.0264	0.2899
rs72720396	0.0114265	8.70001e-09	0.007402	0.511567	-0.000611	0.960624	0.0035	0.7032	-0.0006	0.9631	0.0124	0.6821	-0.0175	0.5295	0.0166	0.474
rs746868	-0.0129055	5.19996e-14	0.012258	0.214959	0.00628133	0.563528	-0.0011	0.8986	0.0094	0.3871	0.0426	0.08957	0.0085	0.7342	0.0054	0.7839
rs7582086	-0.00962821	8.79995e-09	0.011114	0.24765	0.0113461	0.272658	0.0002	0.9756	0.0119	0.2292	0.015	0.5456	0.0376	0.09862	-0.0011	0.9539
rs7599488	-0.0104154	6.69993e-10	0.022393	0.0207737	0.0104916	0.313571	0.0086	0.278	0.0051	0.6073	-0.0289	0.2513	0.0455	0.05147	-0.0065	0.738
rs7808471	-0.0115362	1.09999e-10	0.005555	0.582449	0.0106476	0.344362	0.0142	0.09062	0.0052	0.6299	-0.0181	0.4979	0.0276	0.2629	-0.0007	0.9744
rs7829800	-0.0104463	5.1e-09	0.028204	0.0073804	0.0382899	0.00108735	0.0175	0.03884	0.0251	0.01881	0.0783	0.003077	0.0627	0.01097	0.0293	0.1497
rs8081370	-0.0166666	1.40001e-08	0.009501	0.518888	-0.00216681	0.895167	0.0306	0.02867	0.048	0.009793	0.0049	0.9189	-0.0176	0.6796	0.0478	0.1988
rs862227	-0.0091646	4.30002e-08	-0.018438	0.0574764	-0.022582	0.0381257	0.0049	0.5361	0.0002	0.9862	-0.0149	0.5629	-0.0238	0.3184	0.0189	0.3361
rs893856	-0.013361	1.29999e-08	0.024746	0.0612047	0.0326626	0.0278896	0.0242	0.02423	0.0131	0.3386	0.0212	0.5296	0.0268	0.3927	0.0323	0.2173
CAD: coronary artery disease
MI: myocardial infarction
HF: heart failure
AIS: any ischemic stroke
LAS: large artery stroke
SVS: small vessel stroke
CES: cardioembolic stroke
